# Supplementary material
Source: Springer Nature journal article supplement (https://www.springermedizin.de/resource/supplementary/12913_2011_1919_MOESM2_ESM.pdf/9529580)
Supplement: MOESM2 [file 9529580]

Out: Had a respiratory arrest upstairs, was intubated upstairs for that (...) despite his poor lungs, he was actually extubated fairly readily (.) about uh (...) 48 hours later and since that time has done okay (.) he has needed bipap (...) on occasion (.) his Co2 is probably now at a higher set point that it was before (.) his previous baseline I would suspect was in the 60's or 70's now it seems to be in the 80's or even as high as 90 (.) with that though, he's alert, completely appropriate and a pH of about, a venous pH of about 7.35 (...)

In: Hm okay.

Out: So it seems to be his new set point (.) I suspect he might have had a PE (.) is the reason his ventilation is now worse (.) but, because he had been off his Coumadin, and now the Coumadin has been re-started we haven't chased the pulmonary embolus down because it's not going to change what we do.

In: So it's been re-started without finding out =

Out: = Yes.

In: = where the lower GI bleed came from?

Out: Yep, and he hasn't bled since.
